# Supplementary material
Source: PubMed Central journal article supplement (PMC3498914)
Supplement: ismej20129x1.pdf [file ismej20129x1.pdf]

## Online Supplementary Information

### **Microbial diversity in arctic freshwaters is structured by inoculation of microbes from soils.**

*Crump, B. C.<sup>1</sup>, Amaral-Zettler, L. A.<sup>2,3</sup>, and Kling, G. W.<sup>4</sup>*

<sup>1</sup> University of Maryland Center for Environmental Science, Horn Point Laboratory, 2020 Horns Point Road, Cambridge, MD, 21613. [bcrump@umces.edu](mailto:bcrump@umces.edu)

<sup>2</sup> Marine Biological Laboratory, Josephine Bay Paul Center, 7 MBL St., Woods Hole, MA, 02543. [amaral@mbl.edu](mailto:amaral@mbl.edu)

<sup>3</sup> Brown University, Department of Geological Sciences, Providence, RI, USA, 02912

<sup>4</sup> University of Michigan, Department of Ecology and Evolutionary Biology, 830 North University, Ann Arbor, MI 48109. [gwk@umich.edu](mailto:gwk@umich.edu)

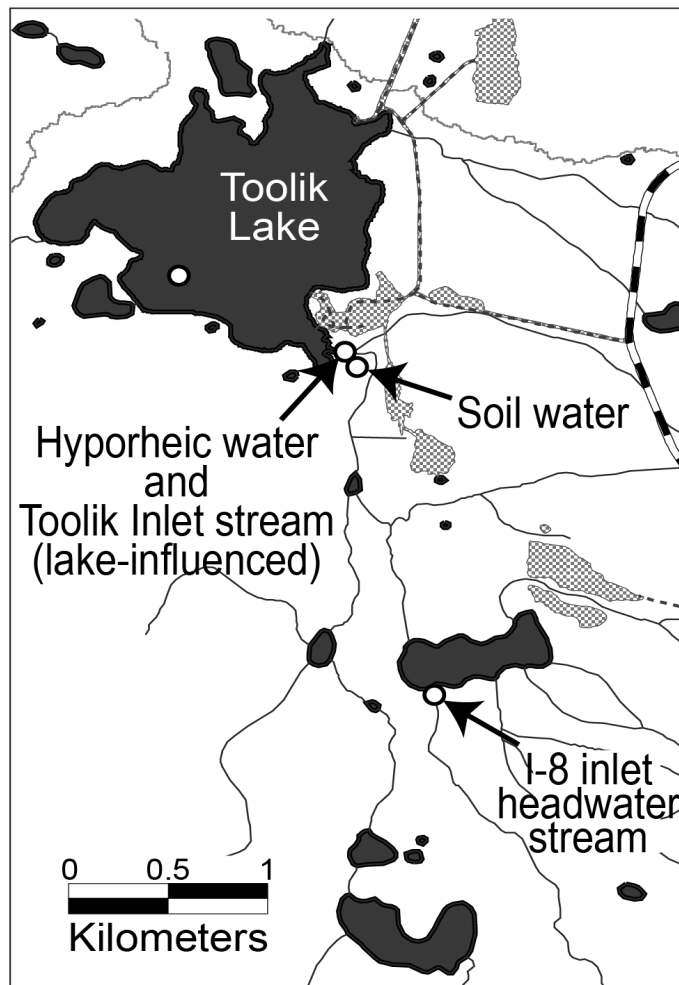

Figure S1. Map of sampling sites. Hatching indicates gravel pads of the Toolik Field Station, and areas of gravel excavation.

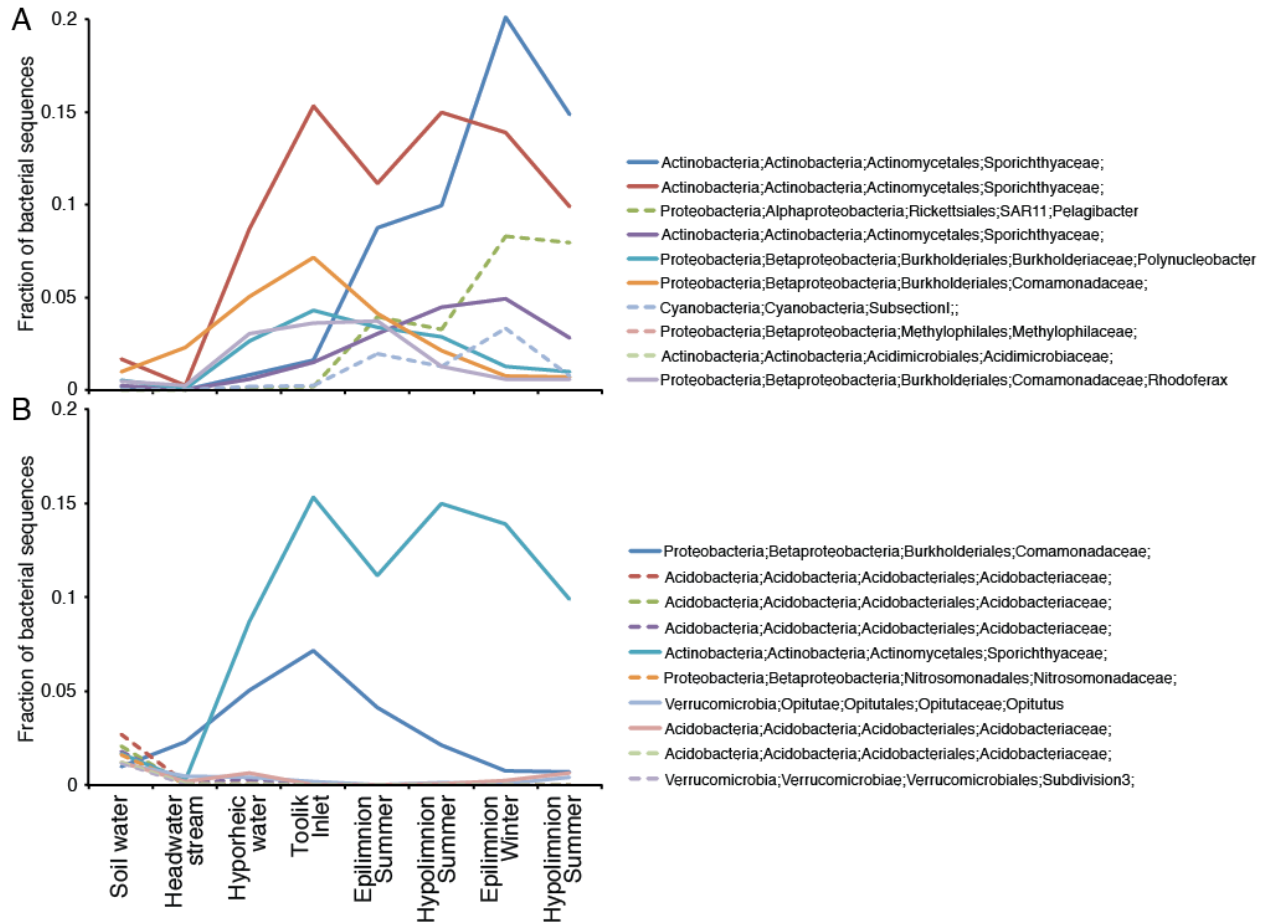

Figure S2. Relative abundance of bacterial sequences for the ten most abundant taxa in Toolik Lake (A), and in soil water and lake-less stream water (B). Taxa were selected by averaging the relative abundances of sequences in each taxon within the two sets of samples. Dashed lines in A indicate taxa that are rare in soil water and lake-less stream water. Dashed lines in B indicate taxa that are rare or absent in Toolik Lake. Rare taxa are represented by <0.1% of sequences in samples. Taxonomic identification for each taxa is based on comparisons to the SILVA-ARB database.

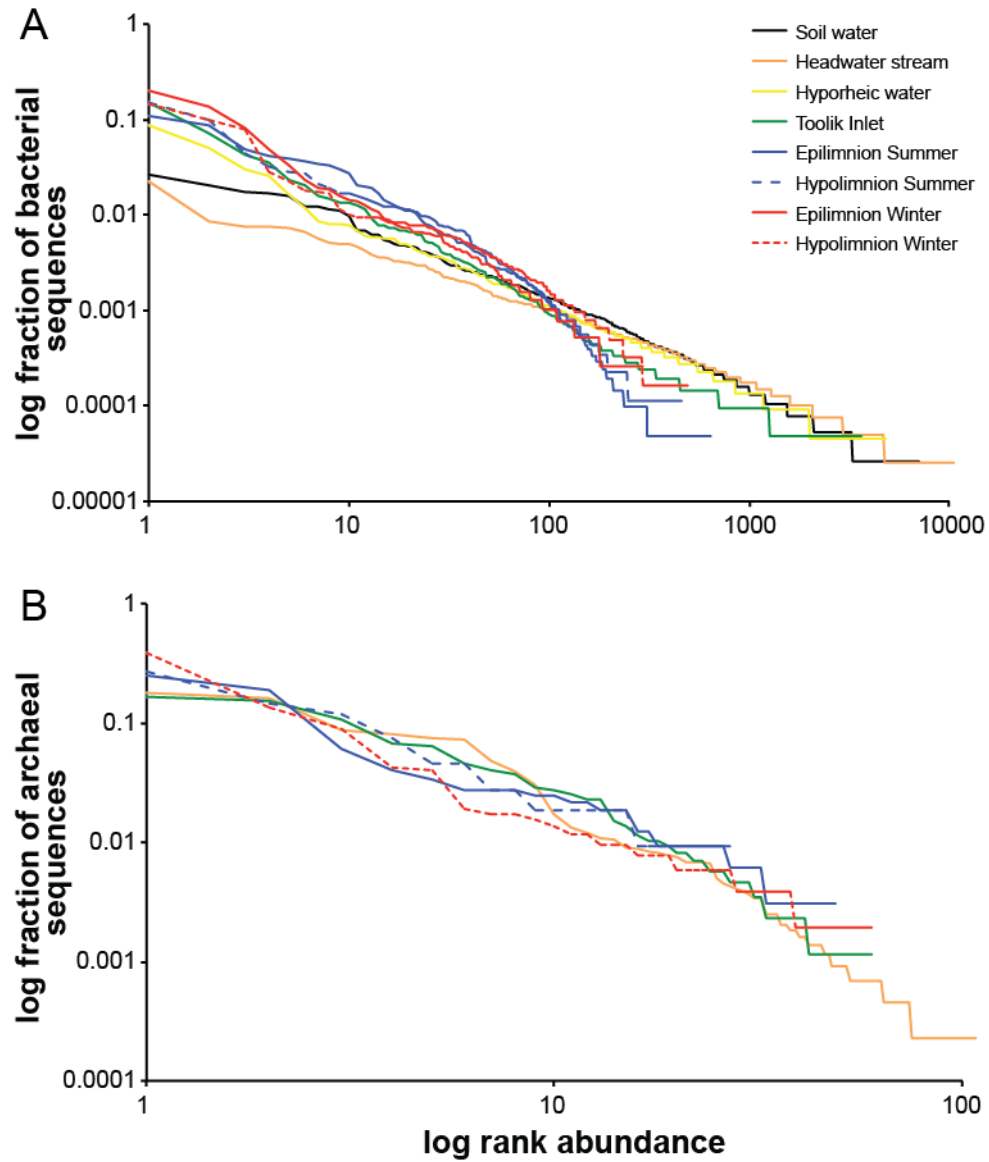

Figure S3. Rank abundance curves for (A) bacterial and (B) archaeal taxa for each site using pooled sequences from duplicate samples (when available, see Tables S1 & S2).

Table S1. Number of DNA sequences for each replicate (rep) sample for Bacteria (BAC), Archaea (ARC), and Eukarya (EUK), and the number of observed taxa (OTUs) determined based on 97% sequence similarity. Eukaryotic sequences classified as metazoa, metaphyta (Viridiplantae/Streptophyta, Rhodophyta), and Unknown ('Unknown Eukarya', 'environmental sample') were omitted.

| <b>Environment</b>             | <b>rep</b> | <b>BAC<br/>Reads</b> | <b>BAC<br/>OTUs</b> | <b>ARC<br/>Reads</b> | <b>ARC<br/>OTUs</b> | <b>EUK<br/>Reads</b> | <b>EUK<br/>OTUs</b> |
|--------------------------------|------------|----------------------|---------------------|----------------------|---------------------|----------------------|---------------------|
| Soil Water                     | A          | 17747                | 4685                | 1491                 | 54                  | 223                  | 85                  |
|                                | B          | 20275                | 4110                | 2422                 | 60                  | *                    | *                   |
| Headwater stream (I-8 inlet)   | A          | 304                  | 252                 | 2156                 | 78                  | 3678                 | 688                 |
|                                | B          | 39280                | 10512               | 2217                 | 80                  | 2772                 | 588                 |
| Hyporheic water (Toolik inlet) | A          | 19443                | 4621                | *                    | *                   | *                    | *                   |
|                                | B          | 2476                 | 999                 | *                    | *                   | *                    | *                   |
| Stream water (Toolik inlet)    | A          | 1770                 | 555                 | 520                  | 53                  | 12752                | 661                 |
|                                | B          | 19071                | 3493                | 346                  | 34                  | 4402                 | 342                 |
| Toolik epilimnion (summer)     | A          | 18322                | 607                 | 117                  | 29                  | *                    | *                   |
|                                | B          | 2312                 | 217                 | 208                  | 35                  | 1206                 | 118                 |
| Toolik hypolimnion (summer)    | A          | 3823                 | 304                 | 58                   | 23                  | 8470                 | 213                 |
|                                | B          | 5005                 | 358                 | 50                   | 10                  | 7973                 | 203                 |
| Toolik epilimnion (winter)     | A          | 1862                 | 214                 | *                    | *                   | 2524                 | 184                 |
|                                | B          | 1986                 | 227                 | 297                  | 36                  | 3291                 | 166                 |
| Toolik hypolimnion (winter)    | A          | 2773                 | 341                 | 221                  | 42                  | 6170                 | 162                 |
|                                | B          | 3406                 | 402                 | 1491                 | 54                  | 9264                 | 169                 |

\* Failed to PCR amplify

Table S2. Number of DNA sequences (reads) and observed OTUs (Obs. OTUs) for each pooled sample for Bacteria, Archaea, and Eukarya. Alpha diversity was estimated (Est. OTUs) by CatchAll for Bacteria and Archaea, and by Chao2 for Eukarya, given the data in Table S1. The Chao1, Shannon diversity index, and Shannon evenness are also included. Bacterial and archaeal sequences from epilimnion and hypolimnion samples were pooled by season (summer, winter) for Toolik Lake. For CatchAll, estimates and 95% upper and lower confidence bounds with Bonferroni corrections (U-CB and L-CB) are presented for the full data sets (Full, all reads), and for reduced data sets randomly resampled to equal sample size (*Reduced*).

| <b>GROUP</b><br><b>Environment</b> | <b>Full #</b><br><b>Reads</b> | <b>Full</b><br><b>Obs.</b><br><b>OTUs</b> | <b>Full</b><br><b>Est.</b><br><b>OTUs</b> | <b>Full</b><br><b>U-CB</b><br><b>Bonf.</b> | <b>Full</b><br><b>L-CB</b><br><b>Bonf.</b> | <b>Chao1</b> | <b>Shannon</b> | <b>Shannon</b><br><b>evenness</b> | <b>Reduced</b><br><b># Reads</b> | <b>Reduced</b><br><b>Obs.</b><br><b>OTUs</b> | <b>Reduced</b><br><b>Est.</b><br><b>OTUs</b> | <b>Reduced</b><br><b>U-CB</b><br><b>Bonf.</b> | <b>Reduced</b><br><b>L-CB</b><br><b>Bonf.</b> | <b>Reduced</b><br><b>Chao1</b> | <b>Reduced</b><br><b>Shannon</b> | <b>Reduced</b><br><b>Shannon</b><br><b>evenness</b> |
|------------------------------------|-------------------------------|-------------------------------------------|-------------------------------------------|--------------------------------------------|--------------------------------------------|--------------|----------------|-----------------------------------|----------------------------------|----------------------------------------------|----------------------------------------------|-----------------------------------------------|-----------------------------------------------|--------------------------------|----------------------------------|-----------------------------------------------------|
| <b>BACTERIA:</b>                   |                               |                                           |                                           |                                            |                                            |              |                |                                   |                                  |                                              |                                              |                                               |                                               |                                |                                  |                                                     |
| Soil water                         | 38022                         | 7113                                      | 26018                                     | 42370                                      | 17270                                      | 13195        | 7.28           | 0.82                              | 10027                            | 3256                                         | 11409                                        | 15449                                         | 8720                                          | 7641                           | 7.00                             | 0.87                                                |
| Headwater stream                   | 39584                         | 10568                                     | 35555                                     | 42315                                      | 30243                                      | 20137        | 8.17           | 0.88                              | 10027                            | 4582                                         | 20769                                        | 25156                                         | 17319                                         | 11232                          | 7.78                             | 0.92                                                |
| Hyporheic water                    | 21919                         | 4928                                      | 17617                                     | 21057                                      | 14919                                      | 10105        | 6.68           | 0.79                              | 10027                            | 2953                                         | 13095                                        | 17060                                         | 10252                                         | 6808                           | 6.49                             | 0.81                                                |
| Toolik Inlet                       | 20841                         | 3697                                      | 16907                                     | 21858                                      | 13334                                      | 9036         | 5.55           | 0.68                              | 10027                            | 2234                                         | 15914                                        | 29180                                         | 9190                                          | 6569                           | 5.43                             | 0.70                                                |
| Toolik Lake summer                 | 29462                         | 873                                       | 4119                                      | 6721                                       | 2699                                       | 2081         | 4.35           | 0.64                              | 10027                            | 487                                          | 1308                                         | 1814                                          | 1026                                          | 1077                           | 4.33                             | 0.70                                                |
| Toolik Lake winter                 | 10027                         | 563                                       | 2548                                      | 6672                                       | 1242                                       | 1095         | 4.28           | 0.68                              | 10027                            | 563                                          | 2548                                         | 6537                                          | 1258                                          | 1095                           | 4.28                             | 0.68                                                |
| <b>ARCHAEA:</b>                    |                               |                                           |                                           |                                            |                                            |              |                |                                   |                                  |                                              |                                              |                                               |                                               |                                |                                  |                                                     |
| Soil water                         | 3913                          | 77                                        | 131                                       | 230                                        | 101                                        | 100          | 1.90           | 0.44                              | 433                              | 32                                           | 51                                           | 88                                            | 42                                            | 62                             | 1.69                             | 0.49                                                |
| Headwater stream                   | 4373                          | 108                                       | 172                                       | 262                                        | 142                                        | 155          | 2.97           | 0.63                              | 433                              | 52                                           | 76                                           | 112                                           | 68                                            | 121                            | 2.89                             | 0.73                                                |
| Toolik Inlet                       | 866                           | 60                                        | 96                                        | 172                                        | 73                                         | 77           | 3.01           | 0.74                              | 433                              | 47                                           | 82                                           | 184                                           | 57                                            | 64                             | 2.95                             | 0.77                                                |
| Toolik Lake summer                 | 433                           | 60                                        | 117                                       | 357                                        | 72                                         | 75           | 2.99           | 0.73                              | 433                              | 60                                           | 117                                          | 357                                           | 72                                            | 75                             | 2.99                             | 0.73                                                |
| Toolik Lake winter                 | 518                           | 60                                        | 93                                        | 138                                        | 76                                         | 79           | 2.59           | 0.63                              | 433                              | 58                                           | 96                                           | 148                                           | 76                                            | 85                             | 2.58                             | 0.64                                                |
| <b>EUKARYA:</b>                    |                               |                                           |                                           |                                            |                                            |              |                |                                   |                                  |                                              |                                              |                                               |                                               |                                |                                  |                                                     |
| Headwater stream                   | 6450                          | 951                                       | 1252                                      | 1299                                       | 1212                                       |              |                |                                   | 2524                             | 865                                          | 1140                                         | 1185                                          | 1102                                          |                                |                                  |                                                     |
| Toolik Inlet                       | 17154                         | 746                                       | 979                                       | 1020                                       | 944                                        |              |                |                                   | 2524                             | 427                                          | 543                                          | 571                                           | 520                                           |                                |                                  |                                                     |
| Toolik hypolimnion (summer)        | 16443                         | 281                                       | 321                                       | 335                                        | 310                                        |              |                |                                   | 2524                             | 177                                          | 200                                          | 211                                           | 193                                           |                                |                                  |                                                     |
| Toolik epilimnion (winter)         | 5815                          | 233                                       | 262                                       | 274                                        | 253                                        |              |                |                                   | 2524                             | 224                                          | 251                                          | 263                                           | 243                                           |                                |                                  |                                                     |
| Toolik hypolimnion (winter)        | 15434                         | 221                                       | 249                                       | 261                                        | 241                                        |              |                |                                   | 2524                             | 160                                          | 181                                          | 191                                           | 174                                           |                                |                                  |                                                     |
